# Supplementary material for: Effect of Mesenchymal Stem Cells Overexpressing BMP-9 Primed with Hypoxia on BMP Targets, Osteoblast Differentiation and Bone Repair
Source: MDPI journal article supplement (doi:10.3390/biology12081147), 2023-08-19
Supplement: s1 [file s1]

**Table S1.** Primer sequences or TaqMan assay identifications and product sizes (bp) for real-time polymerase chain reaction

| Gene          | Sense / anti-sense sequence or TaqMan Assay Identification     | bp  |
|---------------|----------------------------------------------------------------|-----|
| <i>Glut1</i>  | CTG TCG GGT ATC AAT GCT GTG T<br>CGT CCA GCT CGC TCT ACA AC    | 149 |
| <i>Vegfa</i>  | AGC AGA TGT GAA TGC AGA CCA<br>AGG ATT TAA ACC GGG ATT TCT TGC | 112 |
| <i>Bmp-2</i>  | Mm01962382_s1                                                  | 101 |
| <i>Bmp-4</i>  | Mm03413826_mH                                                  | 110 |
| <i>Bmpr1a</i> | TGG GAG TGG ATC TGG ATT GC<br>TCA CCA CGC CAT TTA CCC AT       | 120 |
| <i>Smad1</i>  | GCT TCG TGA AGG GTT GGG G<br>GCT TCG TGA AGG GTT GGG G         | 147 |
| <i>Smad5</i>  | TTG TTC AGA GTA GGA ACT GCA AC<br>GAA GCT GAG CAA ACT CCT GAT  | 114 |
| <i>Hey1</i>   | CCG ACG AGA CCG AAT CAA TAA C<br>TCA GGT GAT CCA CAG TCA TCT G | 125 |
| <i>Runx2</i>  | CTT CAC AAA TCC TCC CCA AGT G<br>GGA ATG CGC CCT AAA TCA CTG   | 150 |
| <i>Sp7</i>    | TTC TGC GGC AAG AGG TTC AC<br>TTG CTC AAG TGG TCG CTT CT       | 125 |
| <i>Alpl</i>   | GGG GTA CAA GGC TAG ATG GC<br>CGG GCT CAA AGA GAC CTA AGA      | 150 |
| <i>Oc</i>     | TTC TGC TCA CTC TGC TGA CC<br>GCT TGG ACA TGA AGG CTT TGT      | 99  |
| <i>Eif2b1</i> | ACC TCC CTG GAA TAC TCT GAC T<br>TCG CCC CGT CTT TGA TGA AT    | 136 |
| <i>Eif2b1</i> | Mm00460997_m1                                                  | 83  |

*Glut1*: solute carrier family 2 (facilitated glucose transporter), member 1, *Vegfa*: vascular endothelial growth factor A, *Bmp-2*: bone morphogenetic protein 2, *Bmp-4*: bone morphogenetic protein 4, *Bmpr1a*: bone morphogenetic protein receptor, type 1A, *Smad1*: SMAD family member 1, *Smad5*: SMAD family member 5, *Hey1*: hairy/enhancer-of-split related with YRPW motif 1, *Runx2*: runt-related transcription factor 2, *Sp7*: osterix, *Alpl*: alkaline phosphatase, *Oc*: osteocalcin, *Eif2b1*: eukaryotic translation initiation factor 2B subunit 1 (alpha)

**Table S2.** Area under the curve (arbitrary unit) calculated to carry out the statistical analyses of the parameters evaluated over time (cell proliferation, cell migration and bone morphometry). The data are presented as mean  $\pm$  standard deviation and compared by Student's t test ( $p \leq 0.05$ )

| Parameter              | Control            | Hypoxia            | p-value |
|------------------------|--------------------|--------------------|---------|
| MSC proliferation      | 269.25 $\pm$ 20.04 | 260.56 $\pm$ 10.36 | 0.414   |
| MSC migration          | 239.96 $\pm$ 16.63 | 274.93 $\pm$ 11.70 | 0.006   |
| MC3T3-E1 proliferation | 327.77 $\pm$ 29.13 | 297.38 $\pm$ 52.25 | 0.291   |
| MC3T3-E1 migration     | 174.42 $\pm$ 18.63 | 207.76 $\pm$ 13.34 | 0.011   |
| BV                     | 3.85 $\pm$ 1.81    | 4.07 $\pm$ 1.31    | 0.748   |
| BV/TV                  | 30.05 $\pm$ 14.01  | 31.97 $\pm$ 10.55  | 0.720   |
| BS                     | 18.38 $\pm$ 9.61   | 25.08 $\pm$ 9.41   | 0.114   |
| Tb.Th                  | 0.22 $\pm$ 0.05    | 0.23 $\pm$ 0.05    | 0.780   |
| Tb.N                   | 0.49 $\pm$ 0.22    | 0.57 $\pm$ 0.25    | 0.395   |
| BMD                    | 0.27 $\pm$ 0.14    | 0.34 $\pm$ 0.09    | 0.160   |

MSC: mesenchymal stem cell, BV: bone volume, BV/TV: percentage of bone volume, BS: bone surface, Tb.Th: trabecular thickness, Tb.N: trabecular number, BMD: bone mineral density
